# Supplementary material
Source: PubMed Central journal article supplement (PMC2695245)

## **Supplement. Detailed description of samples.**

A total of 2,977 schizophrenia patients and 33,746 controls from six European populations were examined for CNVs at the three loci studied here, *NRXN1*, *NRXN2*, and *NRXN3*; 1,439 schizophrenia patients and 28,551 control individuals from Iceland, Scotland, Germany, England, Italy and Finland (The SGENE sample; <http://www.SGENE.eu>), an additional 493 affected and 871 controls from Bonn, Germany, 245 cases and 272 controls from Norway, and 806 cases and 4039 controls from the Netherlands. The full geographic breakdown is shown in supplementary table 1.

The Icelandic sample consists of 648 schizophrenics and 27,747 controls. Patients and controls were all Icelandic and diagnoses were assigned according to Research Diagnostic Criteria (RDC) (35) through the use of the lifetime version of the Schizophrenia and Affective Disorders Schedule (SADS-L) (36). The Icelandic controls were chosen from persons who have participated in other genetic studies at deCODE Genetics. A further 5,630 genotyped samples were examined but excluded from association analysis due to other psychiatric disorders (autism, bipolar disorder, ADHD, dyslexia and alcoholism) and/or first degree relationships to schizophrenic patients.

The Scottish sample is comprised of 211 schizophrenia cases and 229 controls. All participants self-identified as born in the British Isles (95% in Scotland) and met Diagnostic and Statistical Manual of Mental Disorders, 4<sup>th</sup> Edition and ICD-10 (37,38) criteria for schizophrenia. Diagnosis was made by OPCRIT (39). Controls were volunteers recruited through general practices in Scotland, and subjects with major mental illness were excluded.

The German sample (Munich) consisted of 195 Caucasian cases and 192 Caucasian controls. Cases diagnosed with DSMIV schizophrenia were ascertained from the Munich area in Germany. Diagnosis was made according to DSMIV criteria using the Structured Clinical Interview for Axis I DSM-IV Disorders (SCID) (40). The controls were unrelated volunteers randomly selected from the general population of Munich.

The Finnish sample consisted of 191 schizophrenics and 200 regionally selected controls that had no medical history of schizophrenia. Diagnosis was according to DSMIV criteria (DSM-

IV) (37).

The sample from the UK consisted of cases (n = 104) and controls (n = 95) who were unrelated white European Caucasians. All patients were interviewed with the Schedule for Affective Disorders and Schizophrenia Lifetime Version or the Item Group Checklist (IGC) of the Schedule for Clinical Assessment in Neuropsychiatry (SCAN) (38) and diagnosed according to ICD-10 RDC. UK controls were unrelated individuals with no history of major mental illness.

Diagnosis of the 86 Italian cases from the local population of South Verona was also by IGC and ICD-10 RDC for schizophrenia, and the 91 controls were unrelated healthy volunteers randomly selected from the same population.

The German sample (Bonn) is comprised of 491 patients and 881 controls. Patients were recruited from consecutive hospital admissions and were all of German descent. In patients, lifetime best estimate diagnoses according to DSM-IV criteria were based on multiple sources of information including structured interview with the SCID (40) or SADS-L (41), OPCRIT data (39), medical records, and the family history. Best estimate diagnoses were obtained from at least two experienced psychiatrists/psychologists. Controls were derived from two German population-based cohorts, PopGen (N=495) (42) and Heinz Nixdorf Recall (N=386) (43). Ethical approval was obtained from the local Ethics Committees. All participants gave written informed consent.

The Norwegian sample included 245 patients who had been recruited to the TOP study from all the psychiatric hospitals in the Oslo area. The patients were diagnosed according to Structural Clinical Interview for DSM-IV (SCID) as schizophrenia (N=153) schizoaffective (N=34), schizophreniform disorder (N=10), psychosis NOS (N=42) and delusional disorder (N=6). The healthy control subjects (N=272) were randomly selected from statistical records of persons from the same catchment area as the patient groups. Only subjects born in Norway, all of Caucasian origin, were contacted by letter and invited to participate. All subjects have given written informed consent prior to inclusion into the project and the Norwegian Scientific-Ethical Committee and the Norwegian Data Protection Agency approved the study.

The Dutch sample consisted of 806 patients and 706 controls from Utrecht and additional 3,333 control individuals from Nijmegen in the Netherlands. Inpatients and outpatients were recruited from different psychiatric hospitals and institutions throughout the Netherlands, coordinated via academic hospitals in Amsterdam, Groningen, Maastricht and Utrecht. Detailed medical and psychiatric histories were collected, including the Comprehensive Assessment of Symptoms and History (CASH) (45), an instrument for assessing diagnosis and psychopathology. To exclude related patients and controls, all subjects were fingerprinted (Illumina DNA panel, 400 SNPs). Only patients with a DSM-IV diagnosis of schizophrenia were finally included as cases (295.xx). All patients and controls were of Dutch descent, with at least three out of four grandparents of Dutch ancestry. The controls were volunteers and were free of any psychiatric history. Ethical approval was obtained from the local Ethics Committees. All participants gave written informed consent.

The additional Dutch controls consisted of 3,333 samples, collected by the Radboud University Nijmegen Medical Centre (RUNMC) for genetic studies (cancer and control samples). All 3,333 participants used in the present study are of self-reported European descent. The study protocol was approved by the Institutional Review Board of Radboud University and all study subjects gave written informed consent.

The SGENE samples were typed on the HumanHap300 BeadArray™ (Illumina, San Diego, USA) at deCODE genetics. The samples from Bonn were typed at Bonn University on the HumanHap550v3 BeadArray™ (Illumina, San Diego, USA). The Dutch samples from Utrecht University were genotyped at the University of California, Los Angeles, on HumanHap550v3 BeadArray™ (Illumina, San Diego, USA). The remaining Dutch samples were genotyped at deCODE genetics on HumanHap300 BeadArray™ (Illumina, San Diego, USA). The Norwegian samples were genotyped on Affymetrix GeneChip(r) GenomeWide SNP 6.0 array and analyzed using the Affymetrix Power Tools 1.8.0. Samples with Contrast QC below 0.4 were excluded as recommended by the manufacturer.



## References

45. Spitzer,R.L., Endicott,J., Robins,E. (1978) Research diagnostic criteria: rationale and reliability. *Arch. Gen. Psychiatry* 35, 773-782.
46. Spitzer,R.L., E.J. The schedule for affective disorders and schizophrenia, lifetime version, (New York State Psychiatric Institute, New York., 1977).
47. American Psychiatric Association, (1994).
48. WHO, 1994. Schedules for Clinical Assessment in Neuropsychiatry (SCAN) Manual (World Health Organization, 1994).
49. McGuffin, P., Farmer, A., Harvey, I.A, (1991) A polydiagnostic of operational criteria in studies of psychotic illness. Development and reliability of the OPCRIT system. *Arch. Gen. Psychiatry* 764-770.
50. First, M.S.R., Gibbon, M., Williams, J. (1994) Structured Clinical Interview for Axis I DSM-IV Disorders.
51. Endicott J., Spitzer R.L. (1978) A diagnostic interview: the schedule for affective disorders and schizophrenia. *Arch. Gen. Psychiatry.* **35**, 837-844.
52. Lamina C., Steffens M., Mueller J., Lohmussaar E., Meitinger T., Wichmann H.E.(2005) Genetic diversity in german and European populations: looking for substructures and genetic patterns. *Gesundheitswesen.* **67**, Suppl 1, S127-131.

53. Schmermund A., Möhlenkamp S., Stang A., Grönemeyer D., Seibel R., Hirche H., Mann K., Siffert W., Lauterbach K., Siegrist J., Jöckel K.H., Erbel R. (2002) Assessment of clinically silent atherosclerotic disease and established and novel risk factors for predicting myocardial infarction and cardiac death in healthy middle-aged subjects: rationale and design of the Heinz Nixdorf RECALL Study. Risk Factors, Evaluation of Coronary Calcium and Lifestyle. *Am Heart J.* **144**, 212-218.

54. Faerden A., Nesvåg R., Barrett E.A., Agartz I., Finset A., Friis S., Rossberg J.I., Melle I. (2008) Assessing apathy: the use of the Apathy Evaluation Scale in first episode psychosis. *Eur Psychiatry* **23**, 33-39.

55. Andreasen N.C., Flaum, M., Arndt, S. (1992) The Comprehensive Assessment of Symptoms and History (CASH). An instrument for assessing diagnosis and psychopathology. *Arch. Gen. Psychiatry.* **149**, 615-623.

Supplementary table 1: Breakdown of sample by population

| <b>Population</b> | <b>Aff</b> | <b>Ctrl</b> |
|-------------------|------------|-------------|
| Finland*          | 191        | 200         |
| Germany           | 686        | 1073        |
| Holland           | 806        | 4039        |
| Italy             | 86         | 91          |
| Scotland          | 211        | 229         |
| UK                | 104        | 95          |
| Iceland           | 648        | 27747*<br>* |
| Norway            | 245        | 272         |
| Total             | 2977       | 33746       |

\* Part of the Finnish sample comes from a genetic isolate with increased incidence of schizophrenia, we have accordingly analyzed the Finnish sample as two groups in the Cochran-Mantel-Haenszel analysis.

\*\* A further 5,630 genotyped samples were examined but excluded from association analysis due to other psychiatric disorders (autism, bipolar disorder, ADHD, dyslexia and alcoholism) and/or first degree relationships to schizophrenic patients.





|                       |          |               |        |       |                            |            |            |
|-----------------------|----------|---------------|--------|-------|----------------------------|------------|------------|
| Deletion              | Iceland  | Control       | Female | No    | chr2:50,735,657-50,799,203 | rs1518551  | rs858940   |
| Deletion              | Iceland  | Control       | Male   | No    | chr2:50,735,657-50,799,203 | rs1518551  | rs858940   |
| Deletion              | Iceland  | Control       | Female | No    | chr2:50,735,657-50,799,203 | rs1518551  | rs858940   |
| Deletion              | Germany  | Control       | Female | No    | chr2:50,735,657-50,800,548 | rs1518551  | rs17501747 |
| Deletion              | Holland  | Schizophrenia | Female | No    | chr2:50,735,657-50,800,548 | rs1518551  | rs17501747 |
| Deletion              | Iceland  | Control       | Female | No    | chr2:50,786,446-50,882,166 | rs1518548  | rs2352077  |
| Deletion              | Iceland  | Control       | Female | No    | chr2:50,786,446-50,882,166 | rs1518548  | rs2352077  |
| Duplication           | Holland  | Control       | Female | No    | chr2:50,786,446-50,900,862 | rs1518548  | rs9309203  |
| Duplication           | Holland  | Control       | Male   | No    | chr2:50,786,446-50,900,862 | rs1518548  | rs9309203  |
| Duplication           | Holland  | Control       | Male   | No    | chr2:50,786,446-50,900,862 | rs1518548  | rs9309203  |
| Duplication           | Holland  | Schizophrenia | Male   | No    | chr2:50,786,446-50,900,862 | rs1518548  | rs9309203  |
| Deletion              | Iceland  | Control       | Female | e3-e4 | chr2:50,786,446-51,082,210 | rs1518548  | rs10195460 |
| Deletion              | Italy    | Schizophrenia | Female | No    | chr2:50,822,312-50,948,557 | rs10184594 | rs1558799  |
| Deletion              | Holland  | Control       | Male   | No    | chr2:50,822,312-50,990,306 | rs10184594 | rs2193412  |
| Deletion              | Germany  | Schizophrenia | Female | No    | chr2:50,836,690-50,936,258 | rs17041014 | rs10490175 |
| Deletion              | Holland  | Control       | Male   | No    | chr2:50,839,632-50,936,258 | rs10445932 | rs10490175 |
| Deletion              | Holland  | Control       | Male   | No    | chr2:50,839,632-50,936,258 | rs10445932 | rs10490175 |
| Deletion              | Holland  | Control       | Female | No    | chr2:50,839,632-50,936,258 | rs10445932 | rs10490175 |
| Deletion              | Germany  | Schizophrenia | Female | e1-e4 | chr2:50,850,456-51,225,851 | rs3892750  | rs10490158 |
| Deletion              | Germany  | Schizophrenia | Female | No    | chr2:50,856,110-50,900,862 | rs3850332  | rs9309203  |
| Deletion              | Scotland | Control       | Male   | No    | chr2:50,867,151-50,985,170 | rs9309199  | rs2352540  |
| Deletion              | Holland  | Control       | Male   | No    | chr2:50,872,736-50,900,862 | rs9751737  | rs9309203  |
| Deletion              | Germany  | Control       | Female | No    | chr2:50,878,545-50,932,986 | rs3850336  | rs2193225  |
| Deletion              | Holland  | Control       | Male   | No    | chr2:50,890,216-50,990,306 | rs9750635  | rs2193412  |
| Deletion              | Germany  | Schizophrenia | Male   | e1-e4 | chr2:50,890,216-51,116,653 | rs9750635  | rs1995584  |
| Deletion              | Holland  | Control       | Female | No    | chr2:50,912,249-50,948,557 | rs10167695 | rs1558799  |
| Deletion <sup>2</sup> | Iceland  | Autism        | Male   | e1-e4 | chr2:50,947,040-51,164,471 | rs11884918 | rs11896803 |
| Deletion              | Finland  | Control       | Male   | e1-e4 | chr2:50,985,170-51,211,406 | rs2352540  | rs7602156  |
| Deletion              | Holland  | Schizophrenia | Male   | e1-e4 | chr2:51,002,576-51,250,922 | rs7423296  | rs10490156 |
| Deletion              | Holland  | Schizophrenia | Female | e1-e2 | chr2:51,0249,62-51,251,873 | rs4971709  | rs10490155 |

|          |                      |                                              |        |       |                            |            |            |
|----------|----------------------|----------------------------------------------|--------|-------|----------------------------|------------|------------|
| Deletion | Iceland <sup>3</sup> | Alcoholism,<br>Dyslexia                      | Male   | e1-e2 | chr2:51,082,210-51,225,851 | rs10195460 | rs10490158 |
| Deletion | Iceland <sup>3</sup> | Control                                      | Male   | e1-e2 | chr2:51,082,210-51,225,851 | rs10195460 | rs10490158 |
| Deletion | Iceland              | Control                                      | Female | e1-e2 | chr2:51,082,210-51,225,851 | rs10195460 | rs10490158 |
| Deletion | Finland              | Schizophrenia                                | Male   | e1-e2 | chr2:51,101,161-51,344,213 | rs10490162 | rs9309208  |
| Deletion | Holland              | Control                                      | Female | No    | chr2:51,132,898-51,189,362 | rs4971724  | rs2195477  |
| Deletion | Germany              | Control                                      | Female | No    | chr2:51,132,898-51,225,851 | rs4971724  | rs10490158 |
| Deletion | Germany              | Schizophrenia                                | Female | No    | chr2:51,147,600-51,225,851 | rs988982   | rs10490158 |
| Deletion | Iceland              | Control                                      | Female | No    | chr2:51,147,600-51,419,724 | rs988982   | rs1008618  |
| Deletion | Iceland              | First degree<br>relative to<br>schizophrenia | Male   | No    | chr2:51,211,406-51,299,436 | rs7602156  | rs10490153 |
| Deletion | Iceland              | Control                                      | Female | No    | chr2:51,211,406-51,299,436 | rs7602156  | rs10490153 |
| Deletion | Iceland              | Control                                      | Female | No    | chr2:51,211,406-51,299,436 | rs7602156  | rs10490153 |
| Deletion | Iceland              | Schizophrenia                                | Male   | No    | chr2:51,211,406-51,299,436 | rs7602156  | rs10490153 |
| Deletion | Iceland              | Control                                      | Male   | No    | chr2:51,250,505-51,352,966 | rs10490157 | rs1016387  |
| Deletion | Iceland              | Control                                      | Female | No    | chr2:51,250,505-51,352,966 | rs10490157 | rs1016387  |

<sup>1</sup> homozygous deletion

<sup>2</sup> previously identified as a *de novo* deletion in Stefansson et al. (2008)

<sup>3</sup> the control individual is the father of the subject diagnosed with alcoholism and dyslexia

Supplementary figure 1a: NRXN1a expression in normal tissues (216096 s\_at)

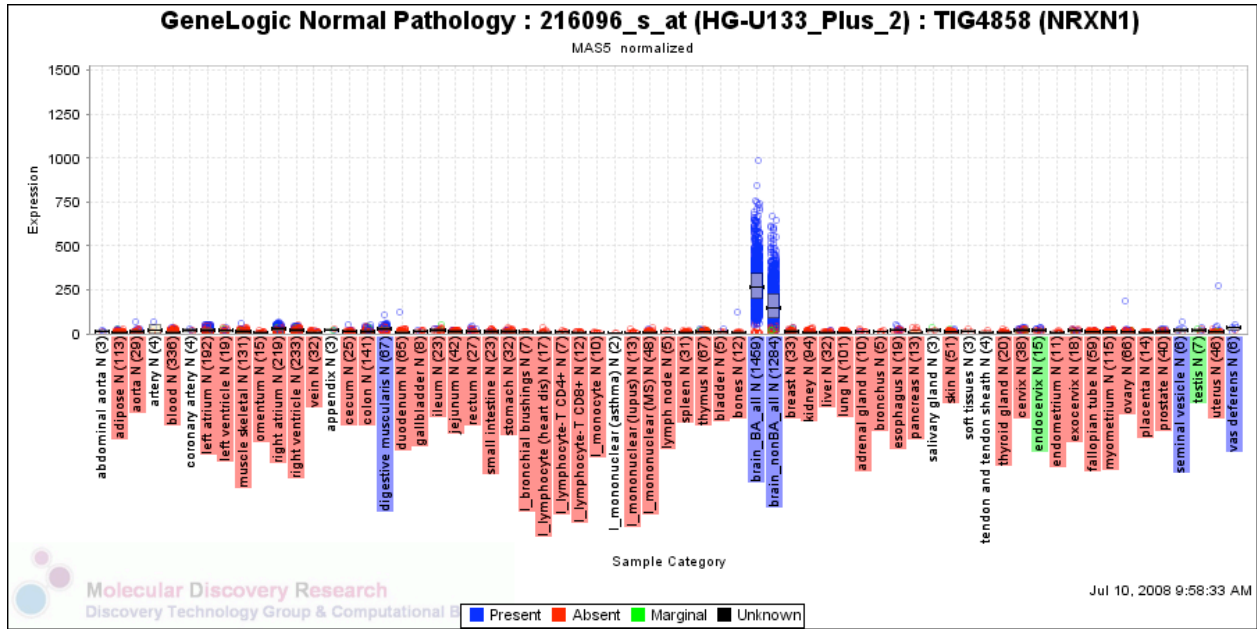

Supplementary figure 1b: NRXN1b expression in normal tissues (209915\_s\_at)

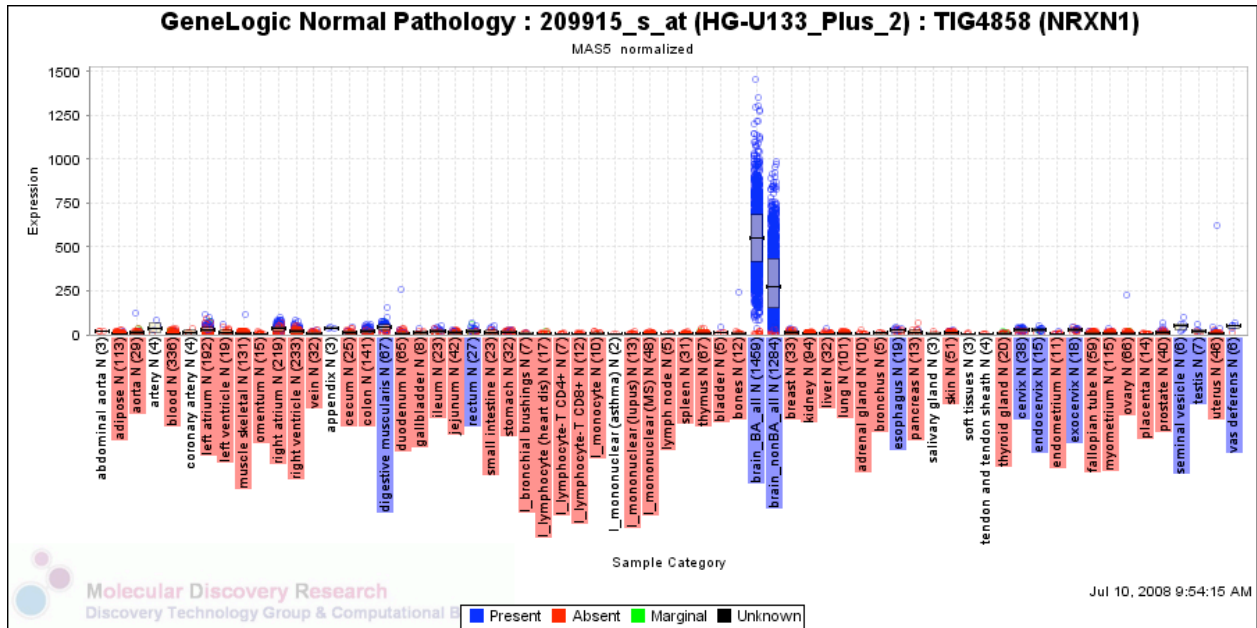

Supplementary figure 1c: NRXN1a-2 expression in normal tissues (1558708\_at)

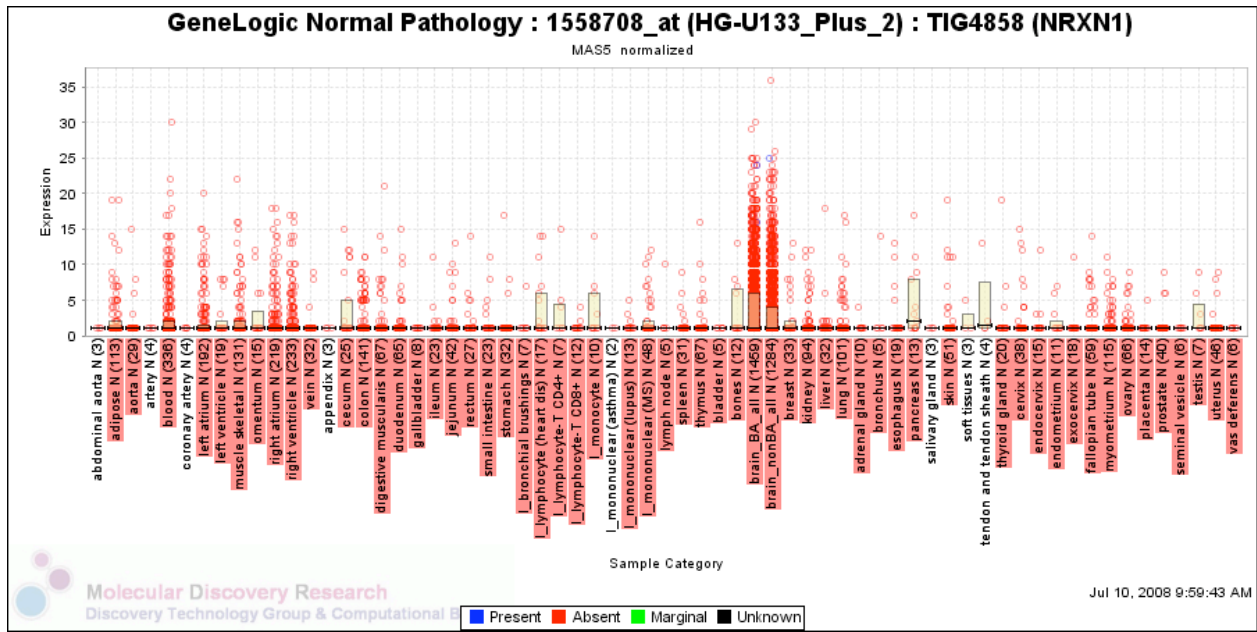

Supplement: NIHMS4942-supplement-S1.pdf [file NIHMS4942-supplement-S1.pdf]
